# Supplementary material for: Powdered Green Tea (Matcha) Attenuates the Cognitive Dysfunction via the Regulation of Systemic Inflammation in Chronic PM2.5-Exposed BALB/c Mice
Source: MDPI journal article supplement (doi:10.3390/antiox10121932), 2021-11-30
Supplement: s1 [file s1]

**Table S1. Catechin contents of aqueous extract of leaf green tea and matcha green tea.** <sup>1)</sup>

|                  | (Unit: mg/g)            |                        |                         |                         |                          |
|------------------|-------------------------|------------------------|-------------------------|-------------------------|--------------------------|
|                  | EGC                     | EC                     | EGCG                    | ECG                     | Total catechin           |
| Leaf green tea   | 39.27±0.58 <sup>b</sup> | 5.22±0.21 <sup>b</sup> | 38.18±0.08 <sup>b</sup> | 10.57±0.07 <sup>b</sup> | 93.24±0.33 <sup>b</sup>  |
| Matcha green tea | 49.49±0.12 <sup>a</sup> | 8.74±0.06 <sup>a</sup> | 50.24±0.57 <sup>a</sup> | 13.75±0.11 <sup>a</sup> | 122.22±0.21 <sup>a</sup> |

Results are mean±SD (n=3). Data were statistically represented at  $p<0.05$ , and different small alphabets mean statistical significance.

**Table S2. Antioxidant capacity of aqueous extract of leaf green tea and matcha green tea.** <sup>1)</sup>

|                  | TPC <sup>1</sup>         | TFC <sup>2</sup>         | ABTS <sup>3</sup>        | DPPH <sup>4</sup>        | MDA <sup>5</sup>        |
|------------------|--------------------------|--------------------------|--------------------------|--------------------------|-------------------------|
| Leaf green tea   | 235.92±1.25 <sup>b</sup> | 83.87±1.03 <sup>b</sup>  | 310.48±2.48 <sup>a</sup> | 380.98±5.15 <sup>a</sup> | 68.15±3.57 <sup>a</sup> |
| Matcha green tea | 325.00±7.35 <sup>a</sup> | 104.24±5.17 <sup>a</sup> | 276.56±4.25 <sup>b</sup> | 321.05±3.24 <sup>b</sup> | 59.98±2.48 <sup>b</sup> |

<sup>1</sup>TPC, total phenolic content; <sup>2</sup>TFC, total flavonoid content; <sup>3</sup>ABTS, ABTS radical scavenging activity; <sup>4</sup>DPPH, DPPH radical scavenging activity; <sup>5</sup>MDA, malondialdehyde (MDA) inhibitory effect. Results shown are mean±SD (n=3). Data were statistically represented at  $p<0.05$ , and different small alphabets mean statistical significance. Results of TPC and TFC are presented as mg of GAE/g and mg of RE/g, respectively. Results of ABTS, DPPH and MDA are presented as IC<sub>50</sub> value (µg/mL).

<sup>1)</sup> Kim, J. M. et al., (2021). Protective effect of matcha green tea (*Camellia sinensis*) extract on high glucose-and oleic acid-induced hepatic inflammatory effect. Korean Journal of Food Science and Technology, 53(3), 267-277.
